# Supplementary material for: Tpl2 regulates intestinal myofibroblast HGF release to suppress colitis-associated tumorigenesis
Source: JCI journal article supplement (doi:10.1172/jci63917), 2012-10-15
Supplement: sd1 [file 1]

## Supplemental Methods

*LPS/D-Galactosamine-Induced Endotoxin Shock.* 8- to 12-week-old Tpl2<sup>D/D</sup> mice and their wildtype littermates received an intraperitoneal (i.p.) injection of 20 mg D-Galactosamine (Sigma) and 10 µg lipopolysaccharide (LPS) derived from *Salmonella enteritidis* (Sigma) per mouse. This treatment results in death from 6 to 9 h.

*Isolation and culture of thioglycollate-elicited peritoneal macrophages (TEPMs).* 8- to 12-week-old mice were injected i.p. with 1 ml thioglycollate broth (Sigma). Four days later, mice were sacrificed and their peritoneal cavities were washed with 5 ml of cold RPMI (Biochrom) containing 10% FBS and 1% Penicillin/Streptomycin. Cells were washed twice with RPMI and they were plated in RPMI supplemented with 5% FBS and 1% Pen/Strep at the concentration of  $2 \times 10^6$  cells/ml. After 5-6 h, non adherent cells were removed and remaining cells were serum starved for 16 h. Next day, cells were stimulated with LPS (1 µg/ml) for 6 h. Supernatant was removed for cytokine measurement and cell density was measured by crystal violet staining to ensure equal number of cells.

*Isolation of lamina propria cells and FACs analysis.* Isolation of lamina propria mononuclear cells was performed as previously described (1). For staining of Treg cells, single cell suspensions were incubated with anti-CD4 and anti-CD25 fluorescent conjugated antibodies (eBioscience), followed with staining with anti-Foxp3 (eBioscience), using the Foxp3 Staining Buffer Set (e-Bioscience) according to manufacturer's instructions. Analysis was performed with the FACs Canto II (Becton Dickinson).

*TNF Elisa.* TNF was measured in culture supernatant of macrophages using an ELISA kit from Pharmingen (OptEIA) according to manufacturer's instructions.

**Table S1. List of Primers**

| <b>Gene</b>                    | <b>Primer Sequence (5'--3')</b>                            | <b>Product size (bp)</b> | <b>Tm (°C)</b> | <b>Reference</b> |
|--------------------------------|------------------------------------------------------------|--------------------------|----------------|------------------|
| <i>KC</i>                      | F: CGCTCGGTTCTCTGTGCA<br>R: ATTTTCTGAACCAAGGGAGCT          | 242                      | 50             |                  |
| <i>HGF</i>                     | F: AGGCCAAGGAGAAGGTTACAGGGG<br>R: AGCCCCATCTGGATTGCGGC     | 160                      | 55             |                  |
| <i>IGF1</i>                    | F: GGGAGATGCAAAGGCCTCCCC<br>R: ACCAGGACTCCCAAATCCCTAGCC    | 142                      | 56             |                  |
| <i>Wisp1</i>                   | F: CAGATGGCTGTGAATGCTGT<br>R: AAGGACTCGCCATTGGTGTA         | 199                      | 58             | (2)              |
| <i>Hif1a</i>                   | F: TGCTCATCAGTTGCCACTTC<br>R: CCATCTGTGCCTTCATCTCA         | 146                      | 58             | (2)              |
| <i>c-myc</i>                   | F: ATGGAGATGAGCCCGACTCCGACC<br>R: GGGCCAGCCCTGAGCCCCTAGTGC | 156                      | 55             |                  |
| <i>TNF</i>                     | F: CACGCTCTTCTGTCTACTGA<br>R: ATCTGAGTGTGAGGGTCTGG         | 110                      | 55             |                  |
| <i>IL-6</i>                    | F: CTTCTTGGGACTGATGCTGGTGAC<br>R: TCCAGGTAGCTATGGTACTCCAGA | 336                      | 55             |                  |
| <i>IL-1<math>\beta</math></i>  | F: CTGAAGCAGCTATGGCAACTG<br>R: TTTCAGCTCATATGGGTCCGA       | 443                      | 57             |                  |
| <i>IL-18</i>                   | F: CAGGCCTGACATCTTCTGCAA<br>R: TCTGACATGGCAGCCATTGT        | 105                      | 58             |                  |
| <i>IFN-<math>\gamma</math></i> | F: ACTGGCAAAAGGATGGTGAC<br>R: TGAGCTCATTGAATGCTTGG         | 237                      | 60             | (2)              |
| <i>COX2</i>                    | F: TCAGTTTTTCAAGACAGATC<br>R: TCTCTACCTGAGTGTCTTTG         | 197                      | 50             |                  |
| <i>MCP1</i>                    | F: AGCACCAGCACCAGCCAACT<br>R: TTCCTTCTTGGGGTCAGCAC         | 295                      | 55             |                  |
| <i>TGF<math>\beta</math>3</i>  | F: TGGCCGTCTGCCCCAAAGGA<br>R: ACCCGGA ACTCTGCCCCGAA        | 100                      | 58             |                  |
| <i><math>\beta</math>2m</i>    | F: TTCTGGTGCTTGTCTCACTGA<br>R: CAGTATGTTTCGGCTTCCCATTTC    | 104                      | 55             |                  |

**Figure S1**

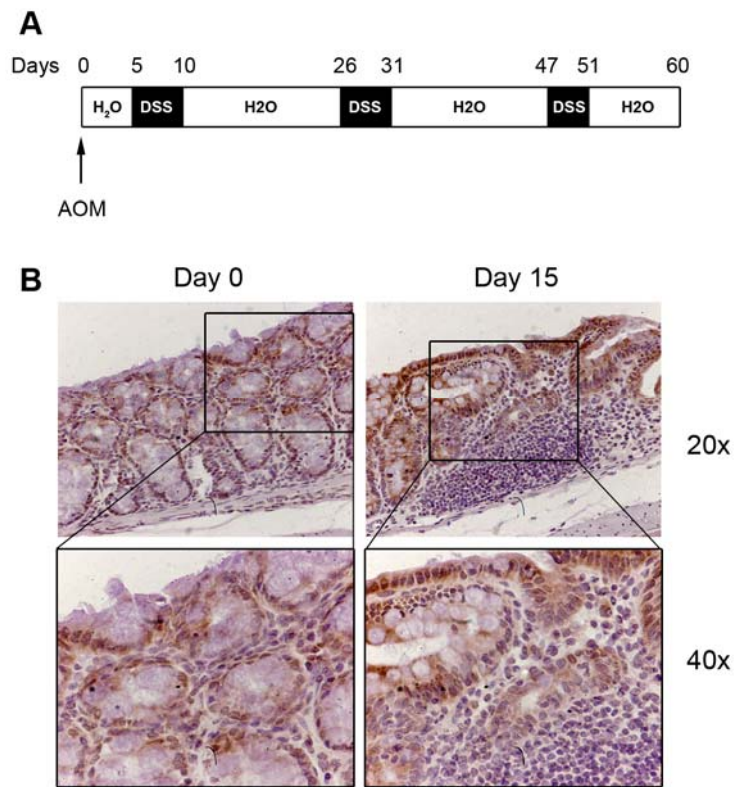

**Figure S1**

Tpl2 expression during the AOM/DSS model of colitis-associated cancer. (A) Schematic diagram of the AOM/DSS model of CAC. A single AOM injection (10 mg/Kg) is followed by 3 cycles of 2% DSS administration in drinking water (black boxes). (B) Immunohistochemical staining of Tpl2 in colon tissue slides at Day 0 and 15 of the AOM/DSS protocol.

**Figure S2**

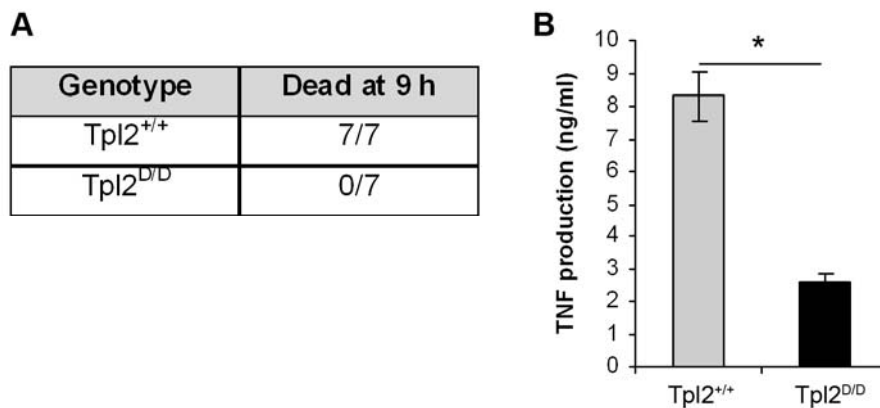

**Figure S2**

Tpl2<sup>D/D</sup> mice display resistance to LPS/D-Gal lethality and reduced secretion of TNF after LPS stimulation. (A) Tpl2<sup>+/+</sup> (n=7) and Tpl2<sup>D/D</sup> (n=7) were subjected to an i.p. injection of LPS (10 µg/mouse) and D-Gal (20 mg/mouse). Death was monitored for 9 h after the injection. (B) TEPMs from wild-type and Tpl2<sup>D/D</sup> were stimulated with LPS (1 µg/ml) for 6 h and supernatant was used for measurement of TNF. Data represent means ± SE from one of two experiments performed in triplicates. n=3; \*, p<0.05

**Figure S3**

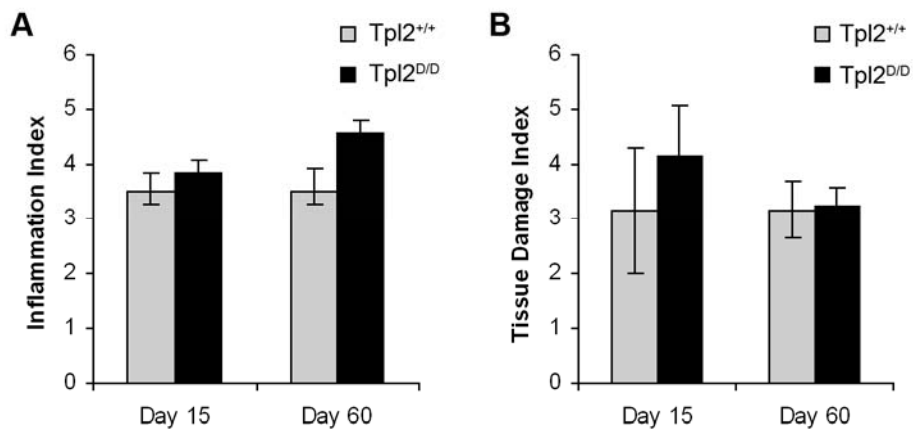

**Figure S3**

$Tpl2^{D/D}$  mice do not show differences in inflammation or tissue damage index either early or late during the disease. (A and B) H&E stained colon sections were scored for inflammation (A) and tissue damage (B) according to Methods section. Data represent means  $\pm$  SE from four individual experiments performed ( $n \geq 5$ ).

**Figure S4**

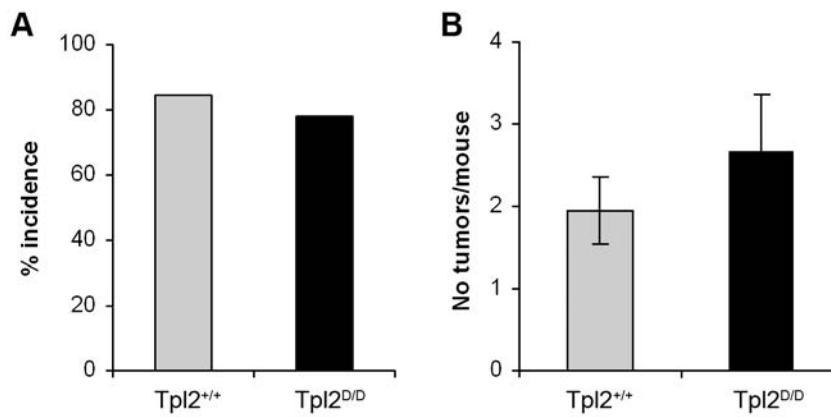

**Figure S4**

$Tpl2^{D/D}$  mice do not show any difference in susceptibility to the AOM model of colon cancer.  $Tpl2^{D/D}$  mice display similar incidence (A) and number of tumours per mouse (B) at 18 weeks after the first AOM injection. Data represent means  $\pm$  SE from one out of two experiments performed (n=11).

**Figure S5**

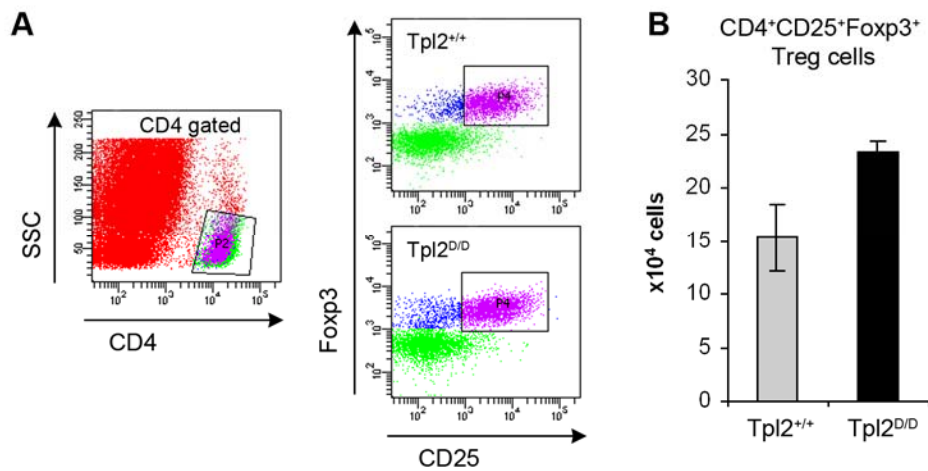

**Figure S5**

Treg cell numbers are the same between Tpl2<sup>+/+</sup> and Tpl2<sup>D/D</sup> mice early during CAC. Lamina propria cells were isolated from Tpl2<sup>+/+</sup> and Tpl2<sup>D/D</sup> mice at Day 15 after AOM administration and stained for CD4, CD25 and Foxp3. (A) FACS analysis was performed on CD4<sup>+</sup> gated cells. Representative dot blots from three independent experiments (n=3) for SSC versus CD4 (P2) and Foxp3 versus CD25 (P4) are shown. (B) Absolute cell numbers of CD4<sup>+</sup>CD25<sup>+</sup>Foxp3<sup>+</sup> cells isolated from the lamina propria of Tpl2<sup>D/D</sup> mice and littermate controls. Data represents means  $\pm$  SE from one representative experiment out of three performed (n=3). Results are not statistically significant.

**Figure S6**

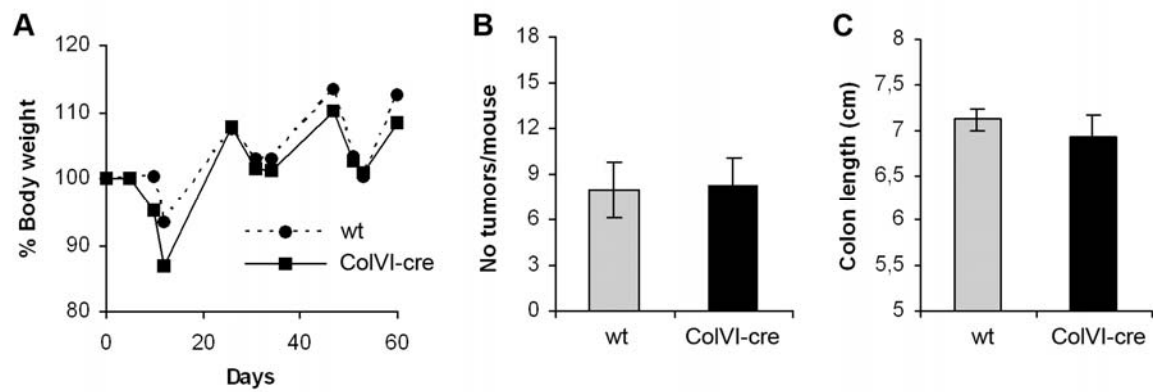

**Figure S6**

CollagenVI-cre transgene has no effect on tumour formation in CAC. CollagenVI-cre (ColVI-cre) mice and their littermate controls were subjected to the AOM/DSS protocol of CAC. Body weight was monitored during the course of the disease (A) and at the end of the protocol tumors multiplicity (B) and colon length (C) were measured. Data show means  $\pm$  SE from one representative experiment out of three performed (n=6 mice per group).

**Figure S7**

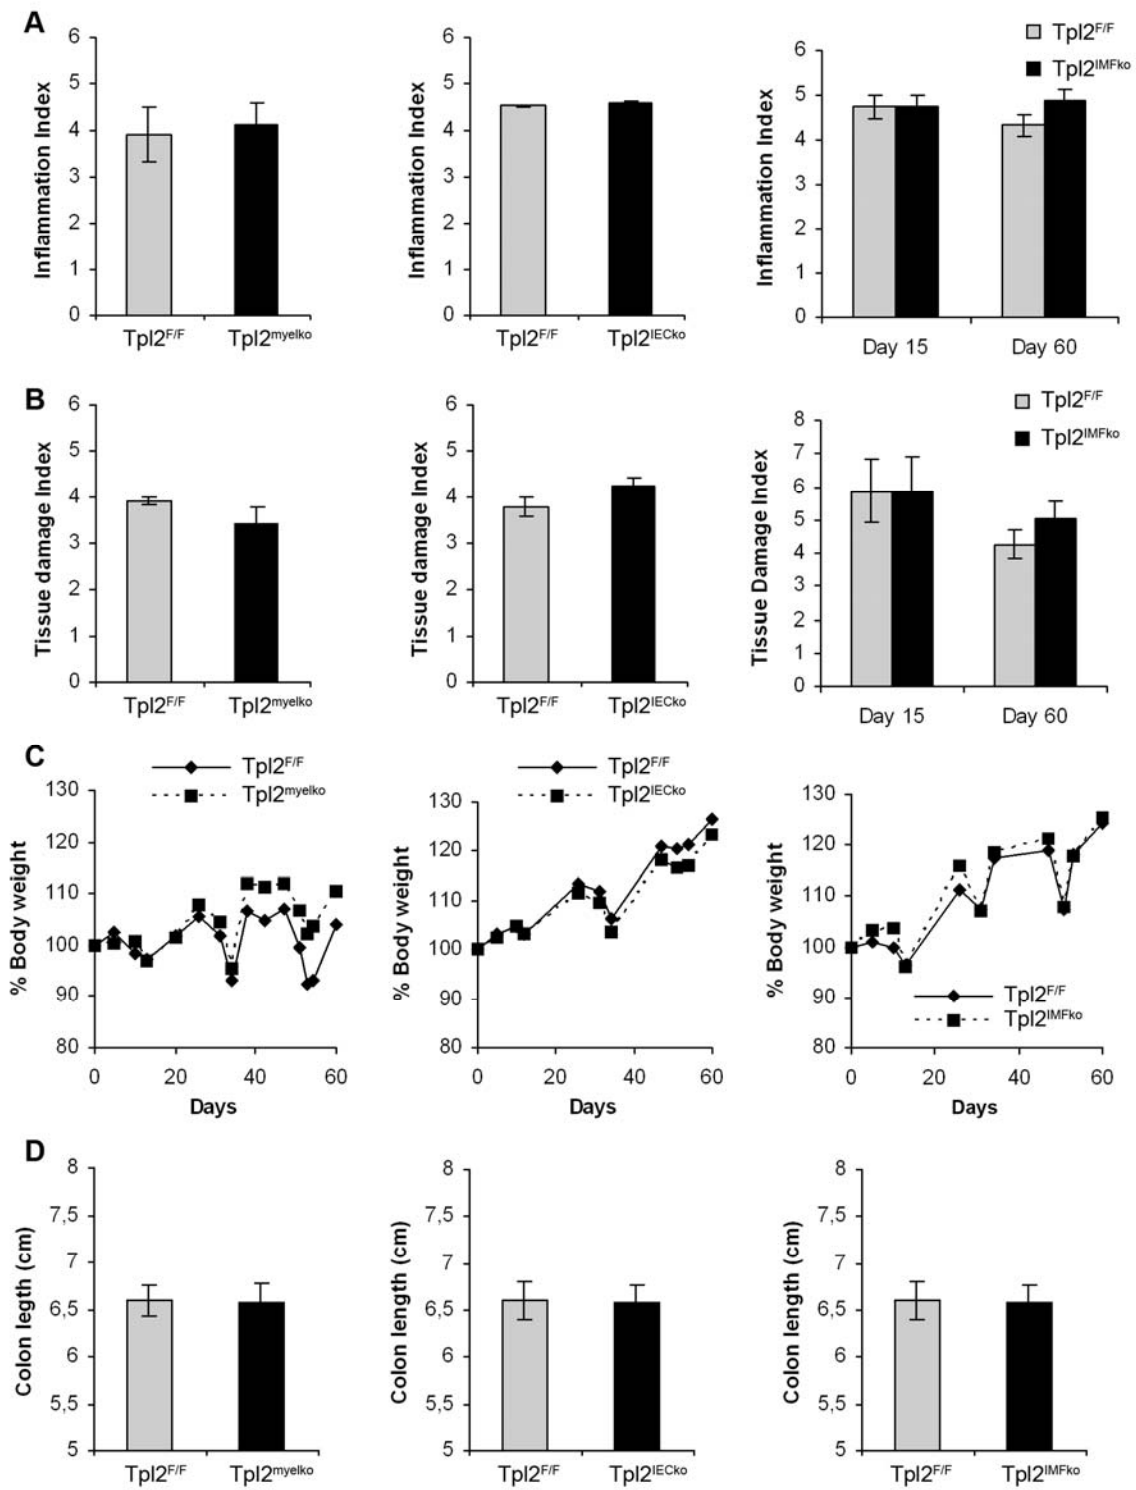

### Figure S7

Tp12<sup>myelko</sup>, Tp12<sup>IEcko</sup> and Tp12<sup>IMFko</sup> do not show any differences in body weight, colon length, inflammation or tissue damage score after AOM/DSS administration in comparison to their littermate controls. Tp12<sup>myelko</sup>, Tp12<sup>IEcko</sup> and Tp12<sup>IMFko</sup> were subjected to the AOM/DSS protocol of CAC. (A and B) H&E stained colon sections were scored for inflammation (A) and tissue damage index (B) according to Methods section. Data represent means  $\pm$  SE from two (for Tp12<sup>myelko</sup> mice) or three (for Tp12<sup>IEcko</sup> and Tp12<sup>IMFko</sup>) experiments performed ( $n \geq 5$ ). (C) Body weight changes were monitored during the course of the experimental procedure. Data represent one out of two (for Tp12<sup>myelko</sup> mice) or three (for Tp12<sup>IEcko</sup> and Tp12<sup>IMFko</sup>) experiments performed ( $n \geq 5$ ). (D) Colon length was measured at the end of the experimental protocol, at Day 60. Data represent means  $\pm$  SE from one out of two (for Tp12<sup>myelko</sup> mice) or three (for Tp12<sup>IEcko</sup> and Tp12<sup>IMFko</sup>) experiments performed ( $n \geq 5$ ).

**Figure S8**

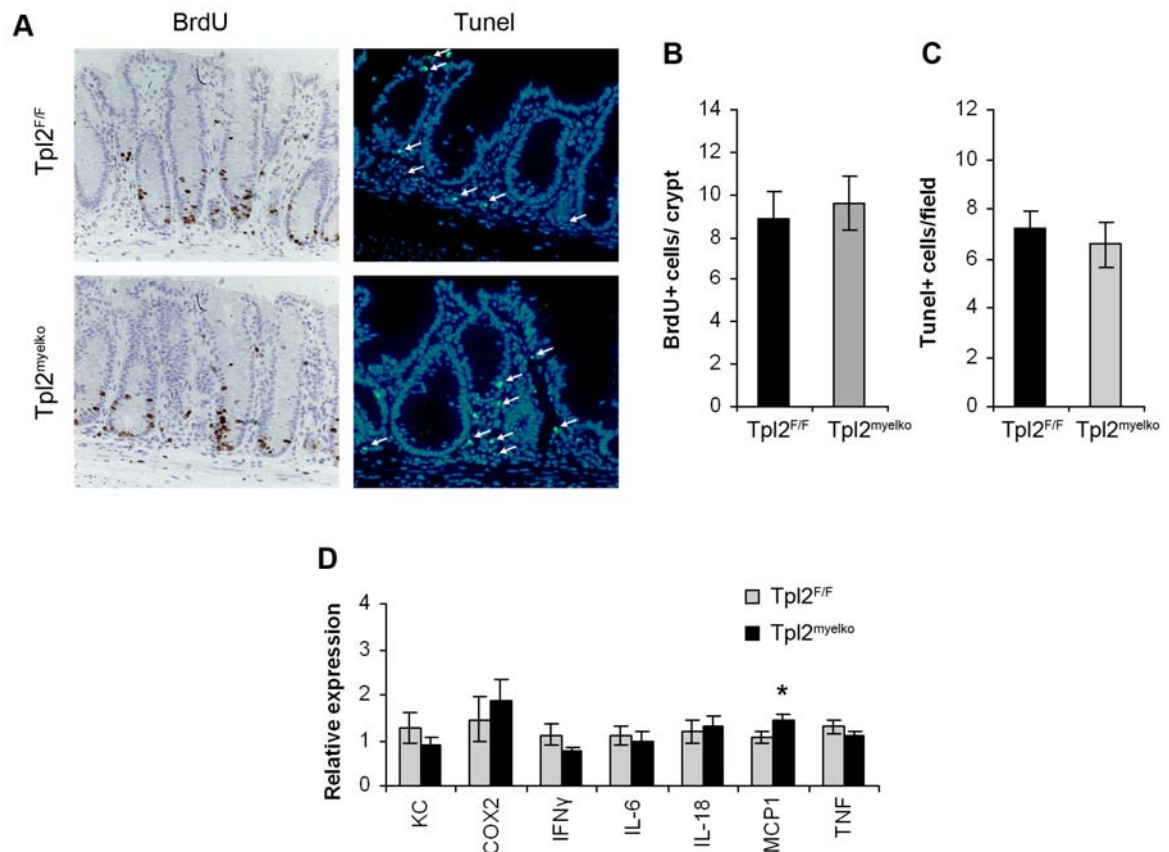

**Figure S8**

$Tpl2^{myelko}$  mice display similar proliferation, apoptosis and cytokine expression early during the disease. (A) Formalin-fixed paraffin-embedded colon sections from  $Tpl2^{F/F}$   $Tpl2^{myelko}$  mice at Day 15 after AOM/DSS initiation were stained with BrdU and TUNEL assay kits for assessment of proliferation and apoptosis, respectively.

Representative images are presented. Arrows indicate TUNEL positive cells. Original magnification x200. Quantification of BrdU positive cells per crypt (B) and TUNEL positive cells per field (C) was performed using at least 20 random crypts and 10 random fields, respectively. Data represent means  $\pm$  SE (n=6, 3 mice from each of 2 individual experiments); \*\*\*, p<0.001. (D) qRT-PCR of genes of interest in whole colon of  $Tpl2^{F/F}$   $Tpl2^{myelko}$  mice at day 15 after AOM/DSS administration. Gene expression was normalized to  $\beta$ 2M levels. Data represent means  $\pm$  SE of 6 mice per genotype (3 mice from each of 2 individual experiments); \*, p<0.05.

**Figure S9**

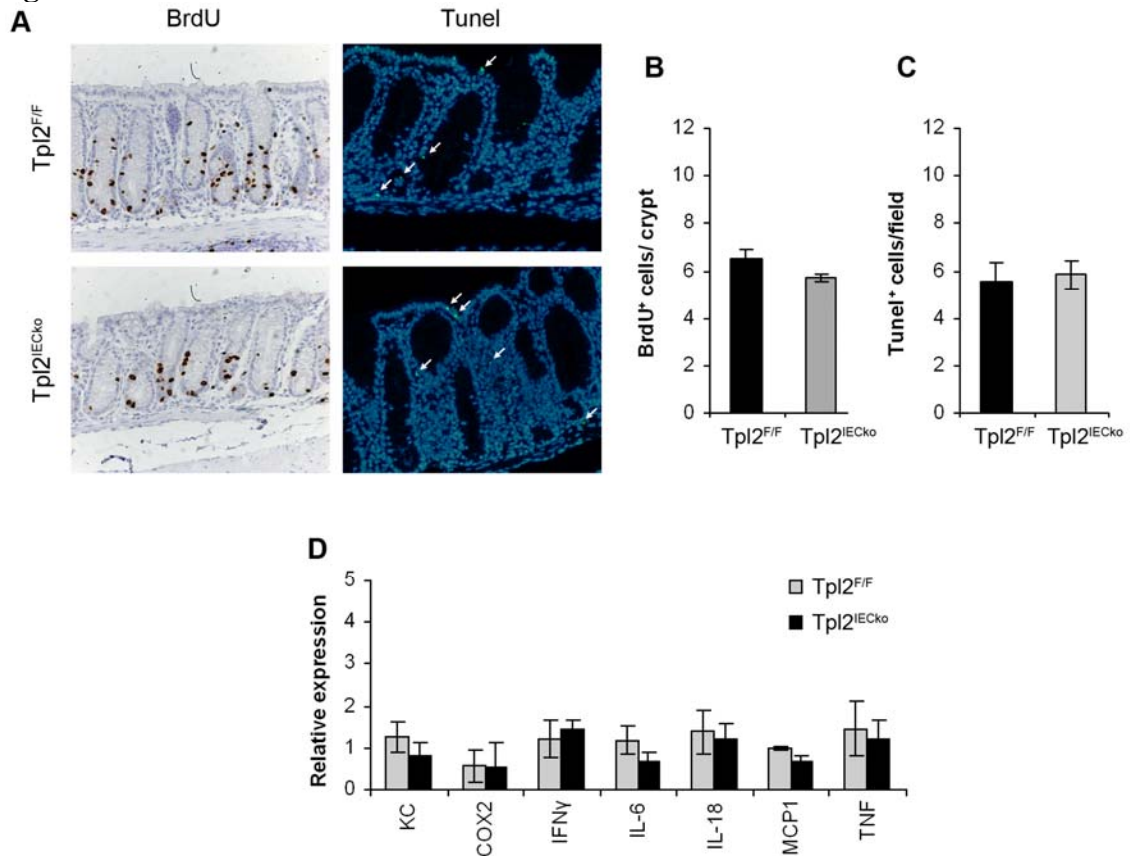

**Figure S9**

$Tpl2^{IECKo}$  mice display similar proliferation, apoptosis and cytokine expression early during the disease. (A) Formalin-fixed paraffin-embedded colon sections from  $Tpl2^{F/F}$   $Tpl2^{IECKo}$  mice at Day 15 after AOM/DSS initiation were stained with BrdU and TUNEL assay kits for assessment of proliferation and apoptosis, respectively. Representative images are presented. Arrows indicate TUNEL positive cells. Original magnification x200. Quantification of BrdU positive cells per crypt (B) and TUNEL positive cells per field (C) was performed using at least 20 random crypts and 10 random fields, respectively. Data represents  $\pm$  SE, (n=6, 3 mice from each of 2 individual experiments); \*\*\*,  $p < 0.001$ . (D) qRT-PCR of genes of interest in whole colon of  $Tpl2^{F/F}$   $Tpl2^{IECKo}$  mice at day 15 after AOM/DSS administration. Gene expression was normalized to  $\beta 2M$  levels. Data represent means  $\pm$  SE of 6 mice per genotype (3 mice from each of 2 individual experiments).

## References

1. Weigmann B, et al. Isolation and subsequent analysis of murine lamina propria mononuclear cells from colonic tissue. *Nat Protoc.* 2007;2(10):2307-2311.
2. Salcedo R, et al. MyD88-mediated signaling prevents development of adenocarcinomas of the colon: role of interleukin 18. *J Exp Med.* 2010;207(8):1625-1636.
